# Supplementary material for: Structural evidence for an essential Fe–S cluster in the catalytic core domain of DNA polymerase ϵ
Source: PubMed Central journal article supplement — Nucleic Acids Res. 2019 Apr 10;47(11):5712–22. doi: 10.1093/nar/gkz248 (PMC6582351; doi:10.1093/nar/gkz248), 2019-04-10
Supplement: gkz248_supplemental_file.pdf [file gkz248_supplemental_file.pdf]

Supplementary Data For:

**Structural evidence for an essential Fe-S cluster in the catalytic core domain of DNA polymerase  $\epsilon$**

Josy ter Beek<sup>1,#</sup>, Vimal Parkash<sup>1,#</sup>, Göran O. Bylund<sup>1</sup>, Pia Osterman<sup>1</sup>, A. Elisabeth Sauer-Eriksson<sup>2</sup> and Erik Johansson<sup>1,\*</sup>

<sup>1</sup> Department of Medical Biochemistry and Biophysics, Umeå University, Umeå, 90187, Sweden

<sup>2</sup> Department of Chemistry, Umeå University, Umeå, 90187, Sweden

<sup>#</sup>These two authors made an equal contribution

\* To whom correspondence should be addressed. Tel: +46 90 786 66 38; Email: erik.tm.johansson@umu.se

Content:

Supplemental table 1. Data collection and refinement statistics.

Figure S1. Comparison of the CysX-site in Pol2<sub>CORE</sub> structures.

Figure S2. Effect of dNTP concentration in primer extension assays with Pol  $\epsilon$  and Pol  $\epsilon$  CysX<sub>MUT</sub>

Figure S3. Quantification of the exonuclease activity of Pol  $\epsilon$  and Pol  $\epsilon$  CysX<sub>MUT</sub>

Figure S4. Primer extension assays with Pol  $\epsilon$  CysA<sub>MUT</sub>

Figure S5. Primer extension assays with Pol  $\epsilon$  CysB<sub>MUT</sub>

Supplemental Table 1: Data collection and refinement statistics.

|                                                            | Pol2 <sub>CORE</sub> -1-1228 | Pol2 <sub>CORE</sub> -1-1187 | Pol2 <sub>CORE</sub> -yeast-Anom |
|------------------------------------------------------------|------------------------------|------------------------------|----------------------------------|
| <i>Data Collection</i>                                     | PDB ID 6h1v                  | PDB ID 6qib                  | PDB ID 6h1v                      |
| Spacegroup                                                 | C2                           | C2                           | C2                               |
| Cell parameter                                             |                              |                              |                                  |
| <i>a, b, c</i> (Å)                                         | 148.2, 70.0, 149.9           | 158.4 70.4 154.2             | 146.9, 70.3, 149.5               |
| $\alpha, \beta, \gamma$ (°)                                | 90, 109.4, 90                | 90, 113.0, 90                | 90, 109.1, 90                    |
| Wavelength                                                 | 0.9840                       | 0.96770                      | 1.7360                           |
| Resolution range (Å)                                       | 73.0-2.70                    | 78.5-2.80                    | 19.9-6.00                        |
| Outer shell (Å)                                            | 2.80-2.70                    | 2.92-2.80                    | 8.00-6.00                        |
| Completeness (%) <sup>a</sup>                              | 98.6(97.5)                   | 98.5(99.2)                   | 94.9(95.3)                       |
| Redundancy <sup>a</sup>                                    | 2.9(2.7)                     | 4.3(4.5)                     | 1.8(1.8)                         |
| <i>I</i> / $\sigma$ ( <i>I</i> ) <sup>a</sup>              | 5.1(0.9)                     | 7.8(1.3)                     | 24.0(20.0)                       |
| <i>R</i> <sub>meas</sub> (%) <sup>a</sup>                  | 13.8(156.0)                  | 14.4(123.0)                  | 3.3(4.3)                         |
| CC1/2 <sup>a</sup>                                         | 0.972(0.144)                 | 0.995(0.447)                 | 0.998(0.997)                     |
| SigAno <sup>a</sup>                                        | -                            | -                            | 1.21 (1.10)                      |
| <i>Refinement</i>                                          |                              |                              |                                  |
| Resolution (Å)                                             | 2.7                          | 2.8                          | -                                |
| No. of reflections                                         | 39250                        | 36257                        | -                                |
| <i>R</i> <sub>work</sub> (%)/ <i>R</i> <sub>free</sub> (%) | 23.9 (26.6)                  | 22.2 (28.6)                  | -                                |
| <i>No. of atoms</i>                                        |                              |                              |                                  |
| Protein                                                    | 8428                         | 8608                         | -                                |
| DNA                                                        | 528                          | 528                          | -                                |
| dATP                                                       | 30                           | 30                           | -                                |
| Metal                                                      | 1                            | 1                            | -                                |
| Water                                                      | 6                            | 0                            | -                                |
| 4Fe-4S                                                     | 8                            | 8                            | -                                |
| <i>B factors</i>                                           |                              |                              |                                  |
| Protein                                                    | 65.8                         | 74.2                         | -                                |
| DNA                                                        | 55                           | 59.3                         | -                                |
| dATP                                                       | 31.5                         | 41.9                         | -                                |
| Metal                                                      | 44.1                         | 46.4                         | -                                |
| Water                                                      | 38.6                         | -                            | -                                |
| 4Fe-4S                                                     | 73.5                         | 77.7                         | -                                |
| <i>R.m.s deviations</i>                                    |                              |                              |                                  |
| Bond length (Å)                                            | 0.005                        | 0.003                        | -                                |
| Bond angle (°)                                             | 0.717                        | 1.057                        | -                                |
| <i>Ramachandran plot</i>                                   |                              |                              |                                  |
| Most favored (%)                                           | 93.8                         | 94.2                         | -                                |
| Additional allowed (%)                                     | 6.1                          | 5.2                          | -                                |

<sup>a</sup>Values in parentheses are for the outer shell

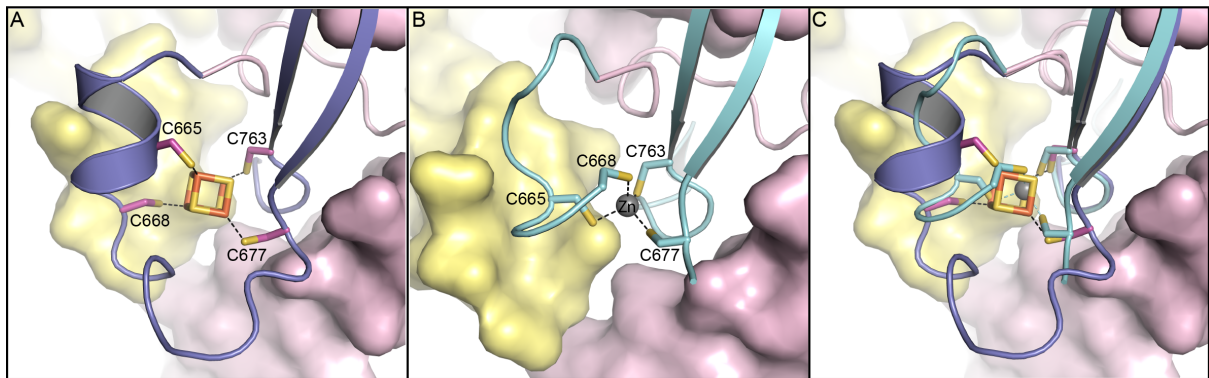

Figure S1. Comparison of the CysX-site with or without a bound Fe-S cluster. A) Zoomed-in view of the Pol2<sub>CORE</sub> structure (PDB ID: 6qib) showing the four cysteines of the CysX motif (as magenta sticks) in the P-domain (in slateblue cartoon) coordinating the four Fe atoms of the [4Fe-4S] cluster. The N-terminal domain and the palm domain are in yellow and pink surface representations, respectively. (B) The previously solved structure (PDB ID: 4m8o (1)) in a similar orientation shows the four cysteines of the CysX motif in the P-domain (in cyan) coordinating a Zn ion. (C) The previous structure with Zn<sup>2+</sup> (PDB ID: 4m8o (1)) superimposed over the new structure containing the Fe-S cluster (PDB ID: 6qib). Formation of an helical structure places two cysteine residues, Cys665 and Cys668 in perfect geometry to allow cluster binding.

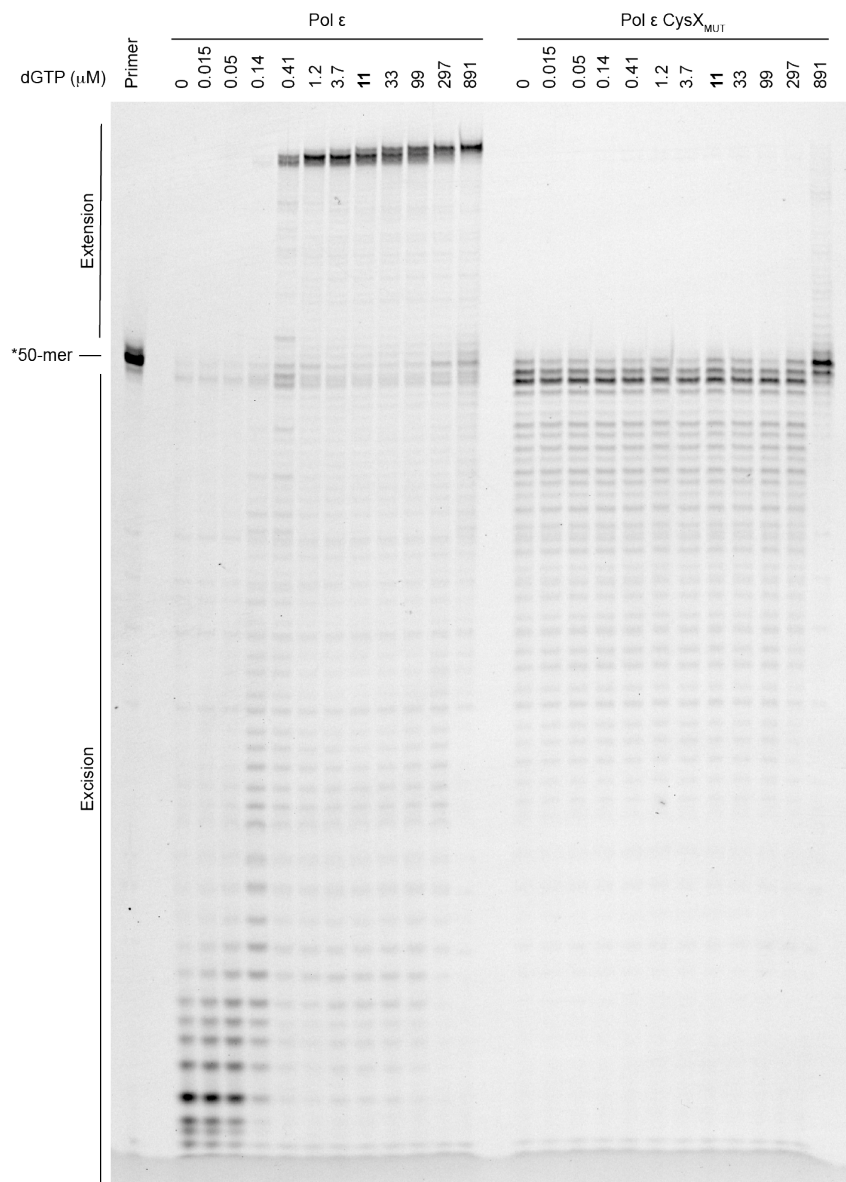

Fig. S2: Effect of dNTP concentration in primer extension assays with Pol  $\epsilon$  and Pol  $\epsilon$  CysX<sub>MUT</sub>. The exonuclease activity in Pol  $\epsilon$  CysX<sub>MUT</sub> can be suppressed but only at the highest dNTP concentrations. At 11  $\mu$ M dGTP, there is also 22  $\mu$ M dATP, 39  $\mu$ M dCTP and 66  $\mu$ M dTTP in the reaction mix, which mimics the physiological concentrations for yeast (2). The effect of a three-fold change in concentration for all four dNTPs is observed in each lane. Primer extension assays in the presence of varying amounts of dNTPs with a DNA substrate consisting of a fluorescently labeled 50-mer primer annealed to a perfectly matched 80-mer template.



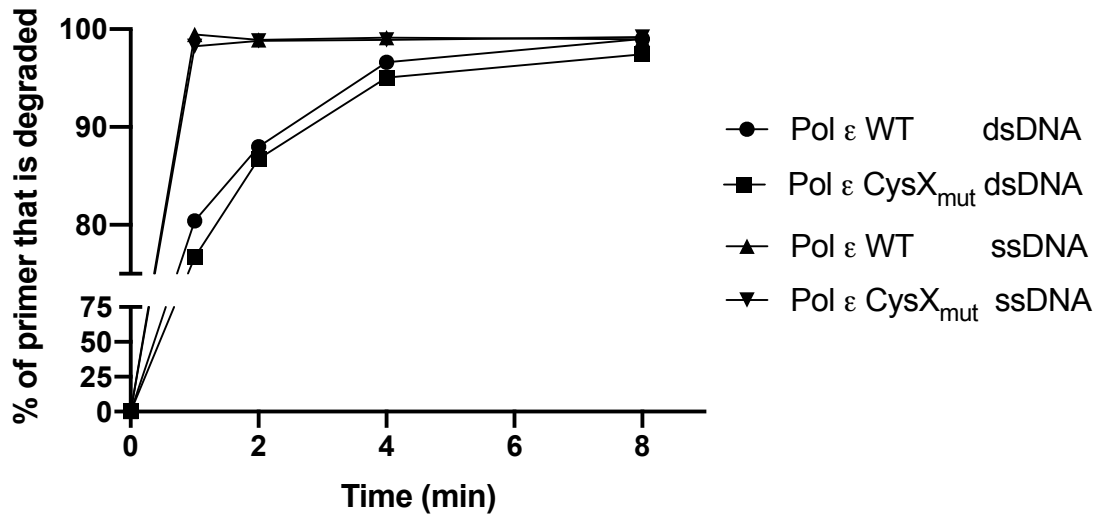

Fig. S3: The shortening of a full-length oligonucleotide occurs at similar rates by Pol ε CysX<sub>MUT</sub> and Pol ε CysX<sub>MUT</sub>. Quantification of the observed exonuclease activity of Pol ε and Pol ε CysX<sub>MUT</sub> on a correctly matched 50/80-mer (dsDNA) or a single stranded 50-mer (ssDNA) substrate in figure 5.

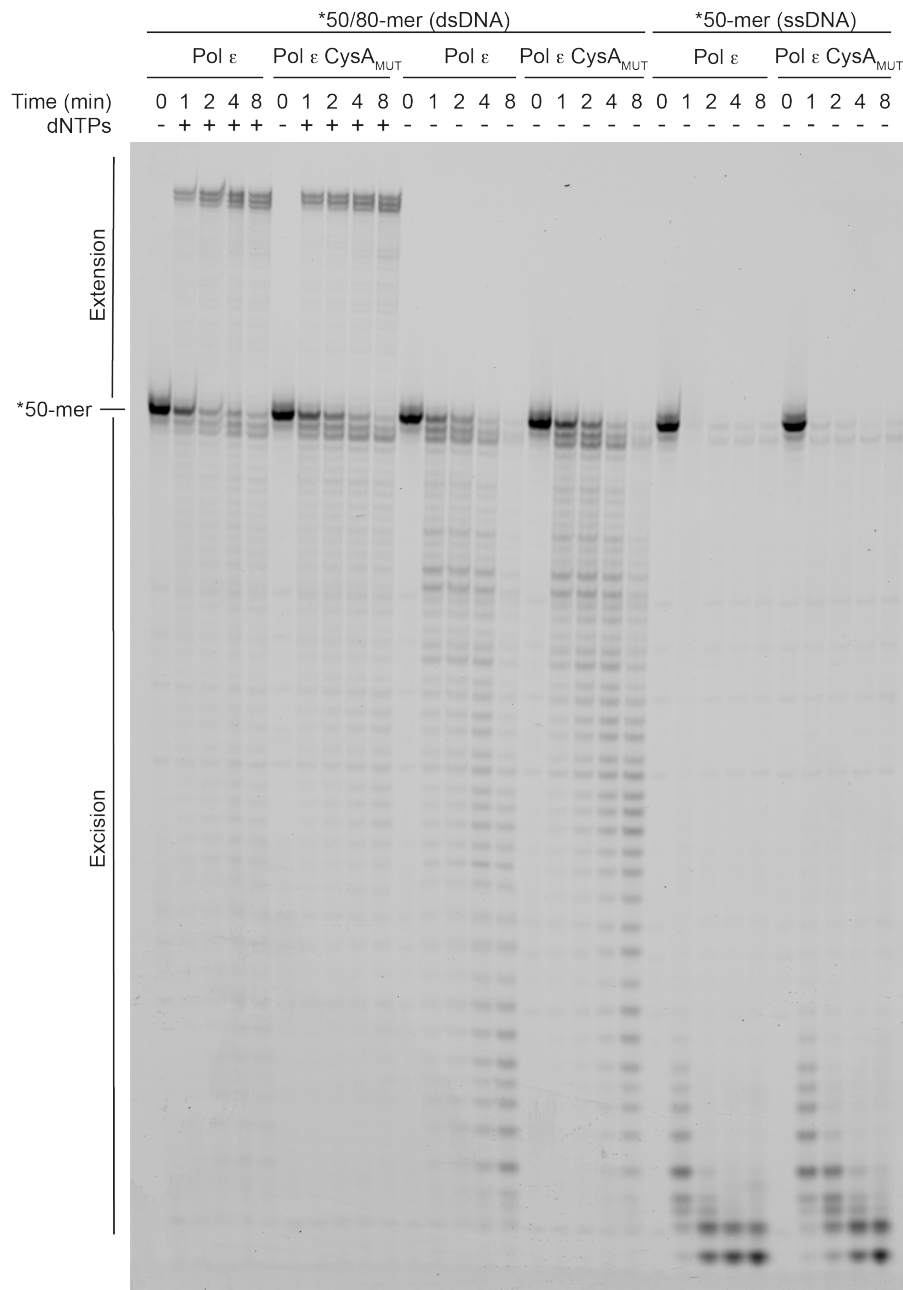

Figure S4. Impact of the substitutions in the CysA motif (C2111S/C2133S) on Pol  $\epsilon$  polymerase and exonuclease activity. Primer extension assays in the presence of dNTPs with a DNA substrate consisting of a fluorescently labeled 50-mer primer annealed to a perfectly matched 80-mer template. The exonuclease activity was assayed in the absence of dNTPs using the same double-stranded DNA substrate or only the single-stranded 50-mer.

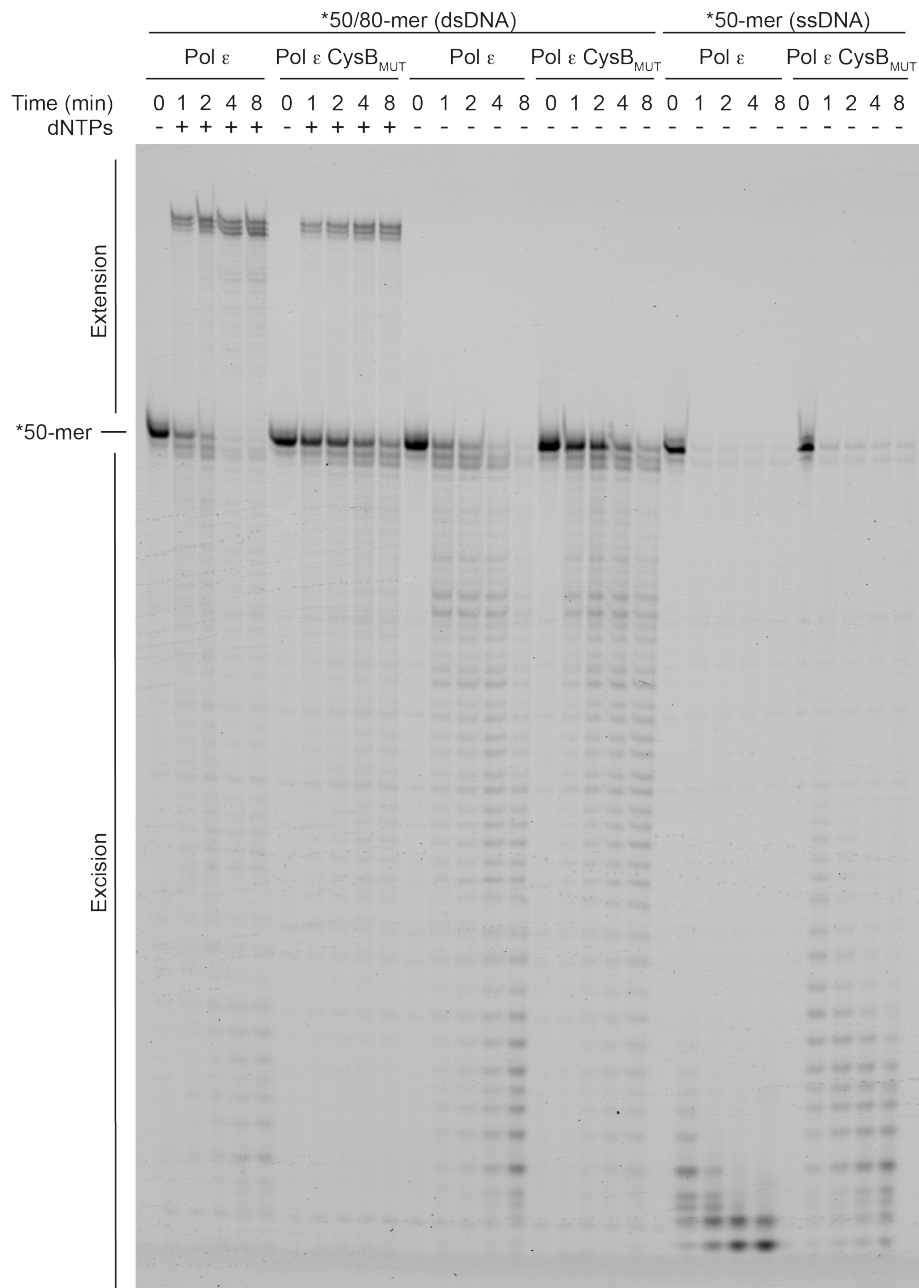

Figure S5. Impact of the substitutions in the CysB motif (C2167S/C2181S) on Pol  $\epsilon$  polymerase and exonuclease activity. Primer extension assays in the presence of dNTPs with a DNA substrate consisting of a fluorescently labeled 50-mer primer annealed to a perfectly matched 80-mer template. The exonuclease activity was assayed in the absence of dNTPs using the same double-stranded DNA substrate or only the single-stranded 50-mer.

## References

1. Hogg,M., Osterman,P., Bylund,G.O., Ganai,R.A., Lundström,E.-B., Sauer-Eriksson,A.E. and Johansson,E. (2014) Structural basis for processive DNA synthesis by yeast DNA polymerase  $\epsilon$ . *Nat. Struct. Mol. Biol.*, **21**, 49–55.
2. Sabouri,N., Viberg,J., Goyal,D.K., Johansson,E. and Chabes,A. (2008) Evidence for lesion bypass by yeast replicative DNA polymerases during DNA damage. *Nucleic Acids Res.*, **36**, 5660–5667.
